# Supplementary material for: In Vitro Selection of Probiotics, Prebiotics, and Antioxidants to Develop an Innovative Synbiotic (NatuREN G) and Testing Its Effect in Reducing Uremic Toxins in Fecal Batches from CKD Patients
Source: MDPI journal article supplement (doi:10.3390/microorganisms9061316), 2021-06-17
Supplement: s1 [file s1]

**Supplementary Table S1.** Main polyphenol classes detected in wild type tomato (WT; cv. Moneymaker) and the high polyphenol enriched transgenic lines Indigo, ResTom, and Bronze.

| Compounds (mg/g DW) | WT                        | Indigo                    | ResTom                   | Bronze                    |
|---------------------|---------------------------|---------------------------|--------------------------|---------------------------|
| Flavonoids          | 0.46 ± 0.029 <sup>c</sup> | 20.39 ± 3.35 <sup>a</sup> | 2.40 ± 0.23 <sup>c</sup> | 14.52 ± 1.12 <sup>b</sup> |
| Anthocyanins        | 0 <sup>c</sup>            | 4.94 ± 0.077 <sup>a</sup> | 0 <sup>c</sup>           | 2.5 ± 0.04 <sup>b</sup>   |
| Stilbenoids         | 0 <sup>c</sup>            | 0 <sup>c</sup>            | 9.12 ± 0.78 <sup>a</sup> | 5.49 ± 1.49 <sup>b</sup>  |

Values within the same row showing different superscript letter are significantly different (Tukey test,  $p < 0.05$ ).
