# Supplementary material for: In Vitro Selection of Probiotics, Prebiotics, and Antioxidants to Develop an Innovative Synbiotic (NatuREN G) and Testing Its Effect in Reducing Uremic Toxins in Fecal Batches from CKD Patients
Source: MDPI journal article supplement (doi:10.3390/microorganisms9061316), 2021-06-17
Supplement: s1 [file s1]

**Supplementary Table S3.** Comparison between the high polyphenol enriched Bronze line and grape (white and red) skin in term of main classes of polyphenols classes.

| Compounds (mg/g DW) | Bronze       | Red Grape    | White Grape  |
|---------------------|--------------|--------------|--------------|
| Flavonoids          | 14.52 ± 1.12 | 1.32 ± 0.92  | 0.60 ± 0.26  |
| Anthocyanins        | 2.5 ± 0.04   | 5.09 ± 0.4   | 0            |
| Stilbenoids         | 5.49 ± 1.49  | 0.24 ± 0.044 | 0.11 ± 0.016 |
