# Supplementary material for: In Vitro Selection of Probiotics, Prebiotics, and Antioxidants to Develop an Innovative Synbiotic (NatuREN G) and Testing Its Effect in Reducing Uremic Toxins in Fecal Batches from CKD Patients
Source: MDPI journal article supplement (doi:10.3390/microorganisms9061316), 2021-06-17
Supplement: s1 [file s1]

**Supplementary Table S2.** Analysis of pomegranate juice extracted from different varieties, specifically Kamel, Emek, Ako, and Wonderful one. Values represent mean  $\pm$  S.E. of four independent biological replicates. Values within the same row showing different superscript letter are significantly different (Tukey test,  $p < 0.05$ ). GAE, Gallic acid equivalents; CE, Catechin Equivalents; C3GE, cyanidin-3-glucoside equivalents; TE, Trolox equivalents; nd, not detected; fw, fresh weight.

| Component                                                  | Kamel                         | Emek                         | Ako                            | Wonderful One                 |
|------------------------------------------------------------|-------------------------------|------------------------------|--------------------------------|-------------------------------|
| Moisture (%)                                               | 86.3 $\pm$ 0.4 <sup>a</sup>   | 87.0 $\pm$ 0.5 <sup>a</sup>  | 86.5 $\pm$ 0.5 <sup>a</sup>    | 86.9 $\pm$ 0.5 <sup>a</sup>   |
| Ash (%)                                                    | 0.6 $\pm$ 0.1 <sup>a</sup>    | 0.5 $\pm$ 0.1 <sup>a</sup>   | 0.6 $\pm$ 0.1 <sup>a16.3</sup> | 0.6 $\pm$ 0.1 <sup>a</sup>    |
| Total Soluble Solids ( $^{\circ}$ Brix)                    | 16.3 $\pm$ 0.3 <sup>a</sup>   | 16.0 $\pm$ 0.3 <sup>a</sup>  | 15.9 $\pm$ 0.3 <sup>a</sup>    | 16.3 $\pm$ 0.4 <sup>a</sup>   |
| pH                                                         | 3.6 $\pm$ 0.2 <sup>ab</sup>   | 4.1 $\pm$ 0.3 <sup>a</sup>   | 4.1 $\pm$ 0.2 <sup>a</sup>     | 3.5 $\pm$ 0.3 <sup>b</sup>    |
| Total carbohydrates (mg (g <sup>-1</sup> ) fw)             | 138.1 $\pm$ 11.2 <sup>a</sup> | 141.9 $\pm$ 3.9 <sup>a</sup> | 114.4 $\pm$ 3.4 <sup>b</sup>   | 149.1 $\pm$ 15.3 <sup>a</sup> |
| Soluble sugars (mg (g <sup>-1</sup> ) fw)                  |                               |                              |                                |                               |
| Glucose                                                    | 46.2 $\pm$ 1.6 <sup>b</sup>   | 50.3 $\pm$ 1.3 <sup>a</sup>  | 40.9 $\pm$ 1.9 <sup>c</sup>    | 41.4 $\pm$ 1.0 <sup>c</sup>   |
| Fructose                                                   | 54.6 $\pm$ 1.9 <sup>a</sup>   | 57.3 $\pm$ 2.5 <sup>a</sup>  | 47.8 $\pm$ 1.0 <sup>b</sup>    | 47.6 $\pm$ 1.1 <sup>b</sup>   |
| Sucrose                                                    | traces                        | traces                       | traces                         | traces                        |
| Total polysaccharides (mg (g <sup>-1</sup> ) fw)           | 33.2 $\pm$ 4.5 <sup>a</sup>   | 38.8 $\pm$ 4.1 <sup>a</sup>  | 33.9 $\pm$ 4.2 <sup>a</sup>    | 32.8 $\pm$ 3.2 <sup>a</sup>   |
| Pectins                                                    | 14.9 $\pm$ 1.7 <sup>a</sup>   | 15.2 $\pm$ 1.7 <sup>a</sup>  | 15.5 $\pm$ 1.3 <sup>a</sup>    | 15.4 $\pm$ 1.2 <sup>a</sup>   |
| Starch                                                     | nd                            | nd                           | nd                             | nd                            |
| Organic acids (mg (g <sup>-1</sup> ) fw)                   |                               |                              |                                |                               |
| Citric acid                                                | 20.4 $\pm$ 1.1 <sup>a</sup>   | 6.2 $\pm$ 0.8 <sup>c</sup>   | 6.3 $\pm$ 0.9 <sup>c</sup>     | 19.3 $\pm$ 1.6 <sup>b</sup>   |
| Succinic acid                                              | 6.0 $\pm$ 0.5 <sup>a</sup>    | 5.5 $\pm$ 0.6 <sup>a</sup>   | 5.7 $\pm$ 0.4 <sup>a</sup>     | 6.9 $\pm$ 1.3 <sup>a</sup>    |
| Malic acid                                                 | 2.4 $\pm$ 0.3 <sup>b</sup>    | 3.9 $\pm$ 0.3 <sup>a</sup>   | 4.3 $\pm$ 0.6 <sup>a</sup>     | 2.5 $\pm$ 0.3 <sup>b</sup>    |
| Tartaric acid                                              | traces                        | traces                       | traces                         | traces                        |
| Vitamin C (mg(g <sup>-1</sup> ) fw)                        |                               |                              |                                |                               |
| Ascorbic acid                                              | 0.42 $\pm$ 0.02 <sup>d</sup>  | 0.58 $\pm$ 0.02 <sup>c</sup> | 0.95 $\pm$ 0.03 <sup>a</sup>   | 0.71 $\pm$ 0.03 <sup>b</sup>  |
| Dehydroascorbic acid                                       | 0.20 $\pm$ 0.03 <sup>b</sup>  | 0.70 $\pm$ 0.01 <sup>a</sup> | 0.23 $\pm$ 0.02 <sup>b</sup>   | 0.06 $\pm$ 0.01 <sup>c</sup>  |
| Phenolics (mg GAE(g <sup>-1</sup> ) fw)                    |                               |                              |                                |                               |
| Soluble                                                    | 4.6 $\pm$ 0.7 <sup>b</sup>    | 9.7 $\pm$ 0.6 <sup>a</sup>   | 9.6 $\pm$ 0.3 <sup>a</sup>     | 9.2 $\pm$ 0.6 <sup>a</sup>    |
| Insoluble                                                  | 0.13 $\pm$ 0.01 <sup>a</sup>  | 0.09 $\pm$ 0.01 <sup>b</sup> | 0.07 $\pm$ 0.01 <sup>b</sup>   | 0.13 $\pm$ 0.01 <sup>a</sup>  |
| Total flavonoids (mg CE(g <sup>-1</sup> ) fw)              | 0.9 $\pm$ 0.1 <sup>b</sup>    | 1.4 $\pm$ 0.1 <sup>a</sup>   | 0.9 $\pm$ 0.1 <sup>b</sup>     | 1.1 $\pm$ 0.3 <sup>ab</sup>   |
| Condensed tannins (mg CE (g <sup>-1</sup> ) fw)            | 0.6 $\pm$ 0.1 <sup>c</sup>    | 1.5 $\pm$ 0.1 <sup>a</sup>   | 1.0 $\pm$ 0.1 <sup>b</sup>     | 1.2 $\pm$ 0.2 <sup>b</sup>    |
| Total anthocyanins (mg C3GE(g <sup>-1</sup> ) fw)          | 0.44 $\pm$ 0.03 <sup>b</sup>  | 0.26 $\pm$ 0.03 <sup>c</sup> | 0.22 $\pm$ 0.01 <sup>c</sup>   | 0.61 $\pm$ 0.09 <sup>a</sup>  |
| Antioxidant activity ( $\mu$ mol TE (g <sup>-1</sup> ) fw) |                               |                              |                                |                               |
| Hydrophilic                                                | 77 $\pm$ 8 <sup>a</sup>       | 68 $\pm$ 4 <sup>a</sup>      | 66 $\pm$ 6 <sup>a</sup>        | 66 $\pm$ 11 <sup>a</sup>      |
| Lipophilic                                                 | 1.4 $\pm$ 0.3 <sup>a</sup>    | 0.7 $\pm$ 0.1 <sup>b</sup>   | 0.4 $\pm$ 0.1 <sup>b</sup>     | 0.9 $\pm$ 0.4 <sup>ab</sup>   |
