# Supplementary material for: In Vitro Selection of Probiotics, Prebiotics, and Antioxidants to Develop an Innovative Synbiotic (NatuREN G) and Testing Its Effect in Reducing Uremic Toxins in Fecal Batches from CKD Patients
Source: MDPI journal article supplement (doi:10.3390/microorganisms9061316), 2021-06-17
Supplement: s1 [file s1]

**Supplementary Table S4.** Main findings leading to constitution of NatuREN G.

| Deliverable                                                      | Description                                                                                                                                                                                                                                                                                        | Outcome                                                                                                                                        | Notes                                                                                                                                                                                                                                                  |
|------------------------------------------------------------------|----------------------------------------------------------------------------------------------------------------------------------------------------------------------------------------------------------------------------------------------------------------------------------------------------|------------------------------------------------------------------------------------------------------------------------------------------------|--------------------------------------------------------------------------------------------------------------------------------------------------------------------------------------------------------------------------------------------------------|
| Selection of antioxidants                                        | Selection of tomato extracts from wild type, Indigo, ResTom, and Bronze varieties                                                                                                                                                                                                                  | Selected antioxidant matrices for further analysis: Indigo, ResTom, and Bronze (among tomato) and Kamel and Wonderful one (among pomegranate). | Excluded strains:<br>- <i>L. acidophilus</i> ATCC4356<br>- <i>Lc. casei</i> ATCC393<br>- <i>Lc. rhamnosus</i> ATCC7469<br>- <i>Lp. plantarum</i> 8VEG3C                                                                                                |
|                                                                  | Pomegranate juice of Kamel, Emek, Ako, and Wonderful one                                                                                                                                                                                                                                           | Reducing from 25 to 19 probiotic strains.                                                                                                      | - <i>Ls. reuteri</i> ATCC23272<br>- <i>Ls. reuteri</i> TMW                                                                                                                                                                                             |
| Selection of prebiotics                                          | FOS, inulin, and $\beta$ -glucans                                                                                                                                                                                                                                                                  | Among prebiotics, $\beta$ -glucans were excluded.                                                                                              |                                                                                                                                                                                                                                                        |
| Evaluation of combined antioxidants with prebiotics              | Pom.S.E.* + FOS (with and without inulin)                                                                                                                                                                                                                                                          | Best thesis: Pom. S. E. + FOS + inulin.                                                                                                        | Excluded strains:<br>- <i>L. acidophilus</i> LA3<br>- <i>Lc. casei</i> BGP93<br>- <i>Lc. rhamnosus</i> LRB<br>- <i>Lc. rhamnosus</i> SP1                                                                                                               |
|                                                                  |                                                                                                                                                                                                                                                                                                    | Reducing from 19 to 12 probiotic strains.                                                                                                      | - <i>Lp. plantarum</i> 4.1<br>- <i>Lp. plantarum</i> ONI17<br>- <i>Lp. plantarum</i> VEGII1                                                                                                                                                            |
| Evaluation of probiotic growth in HC FM <sup>s</sup>             | •HC FM+ FOS+ inulin ( <b>The-1</b> )<br>•HC FM + FOS+ inulin+ Pom.S.E. ( <b>The-2</b> )<br>•HC FM + FOS+ inulin+ ResTom ( <b>The-3a</b> )<br>•HC FM + FOS+ inulin+ Indigo ( <b>The-3b</b> )<br>•HC FM + FOS+ inulin+ Bronze ( <b>The-3c</b> )<br>•HC FM + FOS+ inulin+ WT tomato ( <b>The-3d</b> ) | Best theses: The-1 and The-2.                                                                                                                  |                                                                                                                                                                                                                                                        |
|                                                                  |                                                                                                                                                                                                                                                                                                    | No probiotic strain was excluded.                                                                                                              |                                                                                                                                                                                                                                                        |
| Evaluation of probiotic growth in CKD FM <sup>s</sup>            | •FM(CKD)+ FOS+ inulin ( <b>The-1</b> )<br>•FM(CKD) + FOS+ inulin+ Pom.S.E. ( <b>The-2</b> )                                                                                                                                                                                                        | Except for one strain ( <i>B. animalis</i> 13A), all the probiotics reported an increase of at least one logarithmic cycle in The-2.           | Considering the goal of including antioxidant(s) in the innovative synbiotic formulation, the thesis The-2 was used to proceed with further analyses.                                                                                                  |
| Evaluation of probiotics in terms of release of free amino acids | The analysis was performed comparing CKD with HC FM.                                                                                                                                                                                                                                               | Reducing from 12 to 4 probiotic strains.                                                                                                       | Excluded strains:<br>- <i>B. animalis</i> 13A<br>- <i>B. breve</i> 15A<br>- <i>Lc. paracasei</i> 14A<br>- <i>Lp. plantarum</i> 12A<br>- <i>Lp. plantarum</i> 3ON<br>- <i>Lp. plantarum</i> ONI3<br>- <i>Lp. plantarum</i> VEGI1<br>- <i>Synbio</i> 100 |
|                                                                  |                                                                                                                                                                                                                                                                                                    |                                                                                                                                                |                                                                                                                                                                                                                                                        |

|                                                         |                                                                                                                                                                                                                                                                                                                                                                                                                                                  |                                                                                                                                                                                                                                                                                                                                                  |                                                                                                                                                     |
|---------------------------------------------------------|--------------------------------------------------------------------------------------------------------------------------------------------------------------------------------------------------------------------------------------------------------------------------------------------------------------------------------------------------------------------------------------------------------------------------------------------------|--------------------------------------------------------------------------------------------------------------------------------------------------------------------------------------------------------------------------------------------------------------------------------------------------------------------------------------------------|-----------------------------------------------------------------------------------------------------------------------------------------------------|
| Evaluation of probiotics in terms of production of SCFA | GC-MS <sup>£</sup> analysis was carried out on HC FM added with FOS and inulin (each 2.5 g/L) and singly inoculated with 4 selected probiotics.                                                                                                                                                                                                                                                                                                  | <p>Highest acetic acid producers: <i>Lp. plantarum</i> LPAL and <i>Lc. casei</i> LC4P1.</p> <p><i>Lc. casei</i> LC4P1 produced higher amount of both butanoic and propanoic acids than <i>Lp. plantarum</i> LPAL.</p> <p>The highest concentration of hexanoic acid was found in the HC fecal media inoculated with <i>B. animalis</i> BLC1.</p> | The resulting best SCFA-producing probiotics chosen to constitute the innovative synbiotic were <i>B. animalis</i> BLC1 and <i>Lc. casei</i> LC4P1. |
| Stability test of NatuREN P                             | <ul style="list-style-type: none"> <li>• <i>B. animalis</i> BLC1 (10<sup>9</sup> cells)</li> <li>• <i>Lc. casei</i> LC4P1 (10<sup>9</sup> cells)</li> <li>• FOS (2.5 g)</li> <li>• inulin (2.5 g)</li> <li>• pomegranate seed extract (0.2 g)</li> <li>• maltodextrins from corn (0.5 g)</li> <li>• sodium cyclamate (0.01 g)</li> </ul>                                                                                                         | The cell density of probiotics underwent a decrease of one or more logarithmic cycles already after 2 months at both room (+20°/+30° C) and refrigerated (+2°/+8° C) temperature.                                                                                                                                                                | Rejected                                                                                                                                            |
| Stability test of NatuREN G                             | <ul style="list-style-type: none"> <li>• <i>B. animalis</i> BLC1 (10<sup>9</sup> cells)</li> <li>• <i>Lc. casei</i> LC4P1 (10<sup>9</sup> cells)</li> <li>• FOS (2.5 g)</li> <li>• inulin (2.5 g)</li> <li>• quercetin (0.064 g)</li> <li>• resveratrol (0.023 g)</li> <li>• grapeseed powder extract (0.013 g) proanthocyanidins (tit. 95% d. extr.)</li> <li>• maltodextrins from corn (0.5 g)</li> <li>• sodium cyclamate (0.01 g)</li> </ul> | <p>In NatuREN G, the probiotics' cell density remained approximately stable after two months of product storage at both room (+20°/+30° C) and refrigerated temperature (+2°/+8° C).</p> <p>After 6 months of storage, a slight decrease in cell density was found, but values of cell density were higher than 8 log CFU/g.</p>                 | Optimal                                                                                                                                             |

\* (Pom.S.E.): commercial pomegranate seed extract; §(HC-FM): healthy controls- fecal media; \$(CKD-FM): chronic kidney disease- fecal media; £(GC-MS): gas-chromatography mass-spectrometry.
